# Supplementary material
Source: PubMed Central journal article supplement (PMC4164229)
Supplement: tx5002817_si_001.pdf [file tx5002817_si_001.pdf]

## SUPPORTING INFORMATION

### Mechanism of repair of the acrolein- and malondialdehyde-derived exocyclic guanine adducts by the $\alpha$ -ketoglutarate/Fe(II) dioxygenase AlkB

Vipender Singh<sup>†,‡,§,||</sup>, Bogdan I. Fedeles<sup>†,‡,§,||</sup>, Deyu Li<sup>†,‡,§,||</sup>, James C. Delaney<sup>†,‡,§,<sup>⊥</sup></sup>, Ivan D. Kozekov<sup>Δ</sup>, Albena Kozekova<sup>Δ</sup>, Lawrence J. Marnett<sup>Δ</sup>, Carmelo J. Rizzo<sup>Δ</sup>, and John M. Essigmann<sup>†,‡,§,\*</sup>

Departments of <sup>†</sup>Biological Engineering, <sup>‡</sup>Chemistry and <sup>§</sup>Center for Environmental Health Sciences, Massachusetts Institute of Technology, Cambridge, Massachusetts 02139, USA

<sup>Δ</sup>Departments of Chemistry and Biochemistry, Center in Molecular Toxicology, Vanderbilt Institute of Chemical Biology and Vanderbilt-Ingram Cancer Center, Vanderbilt University Medical Center, Nashville, TN 37232, USA.

<sup>||</sup>These authors contributed equally.

#### Present Address

<sup>⊥</sup>Visterra Inc., Cambridge, MA 02139

#### Corresponding Author

\*To whom correspondence should be addressed. E-mail: jessig@mit.edu.

## Table of contents

**Figure S1.** The -4 charge envelopes showing isotopic resolution among various peaks generated from AlkB repair reactions of a)  $\alpha$ -OH-PdG, b)  $\gamma$ -OH-PdG and c) M<sub>1</sub>dG within 16-mer oligonucleotides.

**Figure S2.** Repair of  $\alpha$ -OH-PdG-containing 16-mer oligonucleotide by AlkB, focusing on the appearance of peak at 1238.68.

**Figure S3.** Repair of  $\alpha$ -OH-PdG (X) in single- and double-stranded DNA (ssDNA and dsDNA) by AlkB.

**Figure S4.** Repair of  $\gamma$ -OH-PdG (X) in single- and double-stranded DNA (ssDNA and dsDNA) by AlkB.

**Figure S5.** Repair of M<sub>1</sub>dG (X) in single- and double-stranded DNA (ssDNA and dsDNA) by AlkB.

**Figure S6.** Reduction of  $\alpha$ -OH-PdG by NaBH<sub>4</sub>.

**Figure S7.** Reduction of  $\gamma$ -OH-PdG by NaBH<sub>4</sub>.

**Figure S8.** Reduction of M<sub>1</sub>dG by NaBH<sub>4</sub>.

**Figure S9.** Effect of pH on reduction of  $\alpha$ -OH-PdG by NaBH<sub>4</sub>.

**Figure S10.** MS/MS fragmentation spectrum of 16mer containing  $\alpha$ -OH-PdG (structures **1a** & **1b**, unreacted starting material) in the incubation of  $\alpha$ -OH-PdG with AlkB. The blue diamond marks the parent ion.

**Figure S11.** MS/MS fragmentation spectrum of 16mer containing dehydrated form of  $\alpha$ -OH-PdG (structure **2**) in the incubation of  $\alpha$ -OH-PdG with AlkB. The blue diamond marks the parent ion.

**Figure S12.** MS/MS fragmentation spectrum of 16mer containing  $\gamma$ -OH-PdG (structures **5a** & **5b**, unreacted starting material) in the reaction of  $\gamma$ -OH-PdG with AlkB. The blue diamond marks the parent ion.

**Figure S13.** MS/MS fragmentation spectrum of 16mer containing G (structure **6**, repair product) in the incubation of  $\gamma$ -OH-PdG with AlkB. The blue diamond marks the parent ion.

**Figure S14.** MS/MS fragmentation spectrum of 16mer containing oxidized  $\gamma$ -OH-PdG (structures **3a** & **3b**) in the incubation of  $\gamma$ -HOPG with AlkB. The blue diamond marks the parent ion.

**Figure S15.** MS/MS fragmentation spectrum of 16mer containing M<sub>1</sub>dG (structure **7**, unreacted starting material) in the incubation of M<sub>1</sub>dG with AlkB. The blue diamond marks the parent ion.

**Figure S16.** MS/MS fragmentation spectrum of 16mer containing G (structure **6**) in the incubation of M<sub>1</sub>dG with AlkB. The blue diamond marks the parent ion.

**Figure S17.** MS/MS fragmentation spectrum of 16mer containing oxidized M<sub>1</sub>dG (structure **8**, epoxide) in the incubation of M<sub>1</sub>dG with AlkB. The blue diamond marks the parent ion.

**Figure S18.** Predicted collision-induced dissociation (CID) fragmentation pattern of the 16mer oligonucleotide. X denotes the lesion or repair reaction intermediate or product. The *m/z* theoretical values of the CID fragments, calculated using Mongo Oligo Mass Calculator v2.06 (<http://library.med.utah.edu/masspec/mongo.htm>) are shown in Tables S2-S9.

Table S1. Calculated and observed monoisotopic molecular weight of oligonucleotides containing lesions, intermediates, and their PFBHA derivatives. Structures are depicted in Figure 3 in the main text

Table S2. Predicted and observed *m/z* for MS/MS fragmentation patterns displayed in Figure S10 of  $\alpha$ -OH-PdG (structures **1a & 1b**) 16mer in the incubation of  $\alpha$ -OH-PdG with AlkB. Predicted CID fragments are shown in Figure S10.

Table S3. Predicted and observed *m/z* for MS/MS fragmentation patterns displayed in Figure S11 of dehydrated  $\alpha$ -OH-PdG (structure **2**) 16mer in the incubation of  $\alpha$ -OH-PdG with AlkB. Predicted CID fragments are shown in Figure S11.

Table S4. Predicted and observed *m/z* for MS/MS fragmentation patterns displayed in Figure S12 of  $\gamma$ -OH-PdG (structures **5a & 5b**) 16mer in the incubation of  $\gamma$ -OH-PdG with AlkB. Predicted CID fragments are shown in Figure S12.

Table S5. Predicted and observed *m/z* for MS/MS fragmentation patterns displayed in Figure S13 of G (structure **6**) 16mer in the incubation of  $\gamma$ -OH-PdG with AlkB. Predicted CID fragments are shown in Figure S13.

Table S6. Predicted and observed *m/z* for MS/MS fragmentation patterns displayed in Figure S14 of oxidized  $\gamma$ -OH-PdG (structures **3a & 3b**) 16mer in the incubation of  $\gamma$ -OH-PdG with AlkB. Predicted CID fragments are shown in Figure S14.

Table S7. Predicted and observed *m/z* for MS/MS fragmentation patterns displayed in Figure S15 of M<sub>1</sub>dG (structure **7**) 16mer in the incubation of M<sub>1</sub>dG with AlkB. Predicted CID fragments are shown in Figure S15.

Table S8. Predicted and observed *m/z* for MS/MS fragmentation patterns displayed in Figure S16 of G (structure **6**) 16mer in the incubation of M<sub>1</sub>dG with AlkB. Predicted CID fragments are shown in Figure S16.

Table S9. Predicted and observed *m/z* for MS/MS fragmentation patterns displayed in Figure S17 of M<sub>1</sub>dG (structure **8**) 16mer in the incubation of M<sub>1</sub>dG with AlkB. Predicted CID fragments are shown in Figure S17.

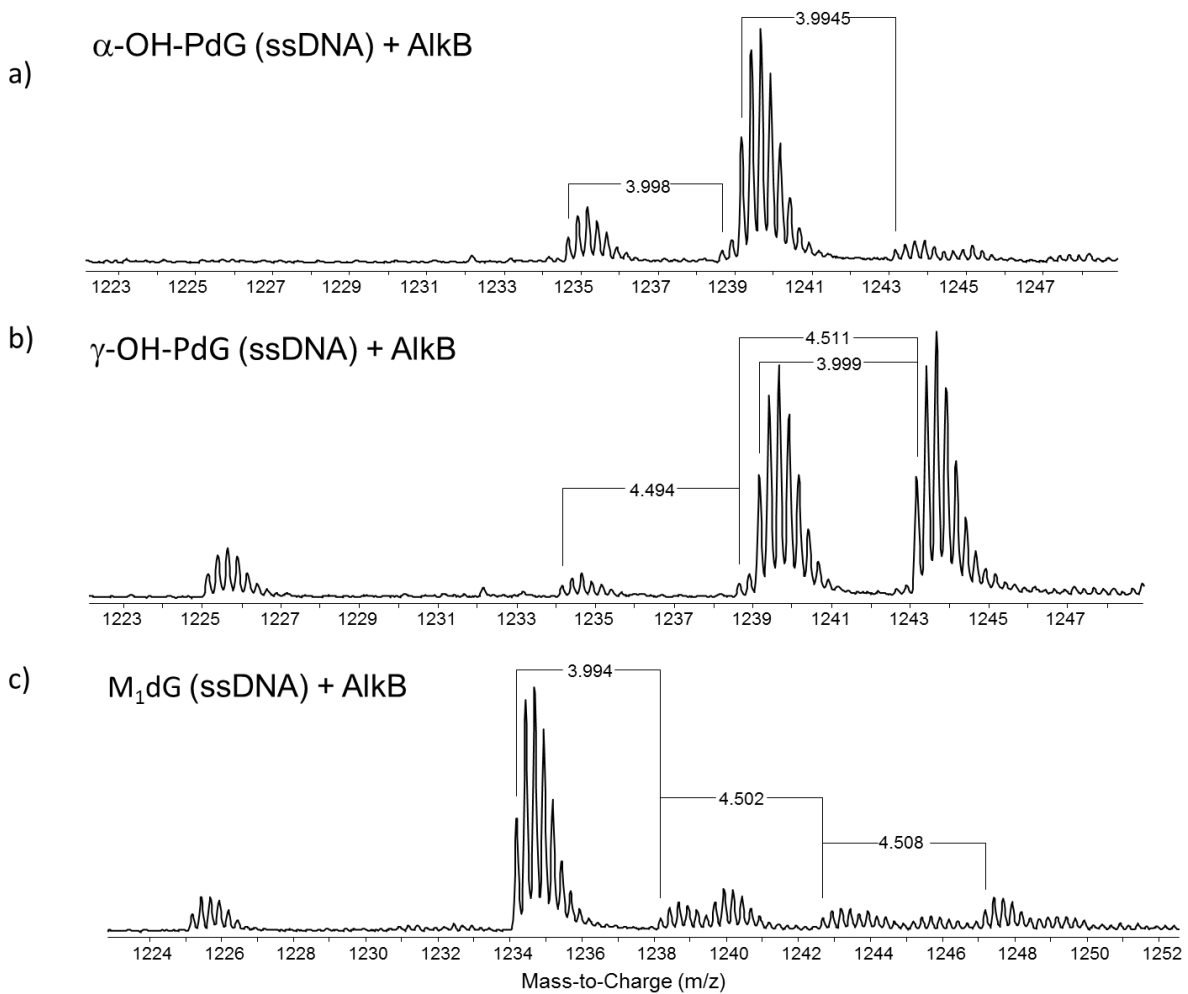

**Figure S1.** The -4 charge envelopes showing isotopic resolution among various peaks generated from AlkB repair reactions of a)  $\alpha$ -OH-PdG, b)  $\gamma$ -OH-PdG and c)  $M_1$ dG within 16-mer oligonucleotides.

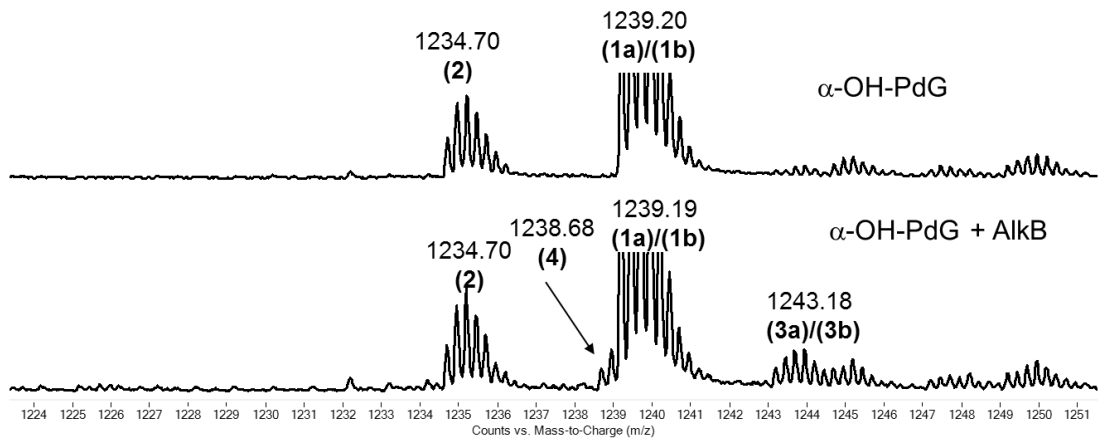

**Figure S2.** Repair of  $\alpha$ -OH-PdG-containing 16-mer oligonucleotide by AlkB, focusing on the appearance of peak at 1238.68.

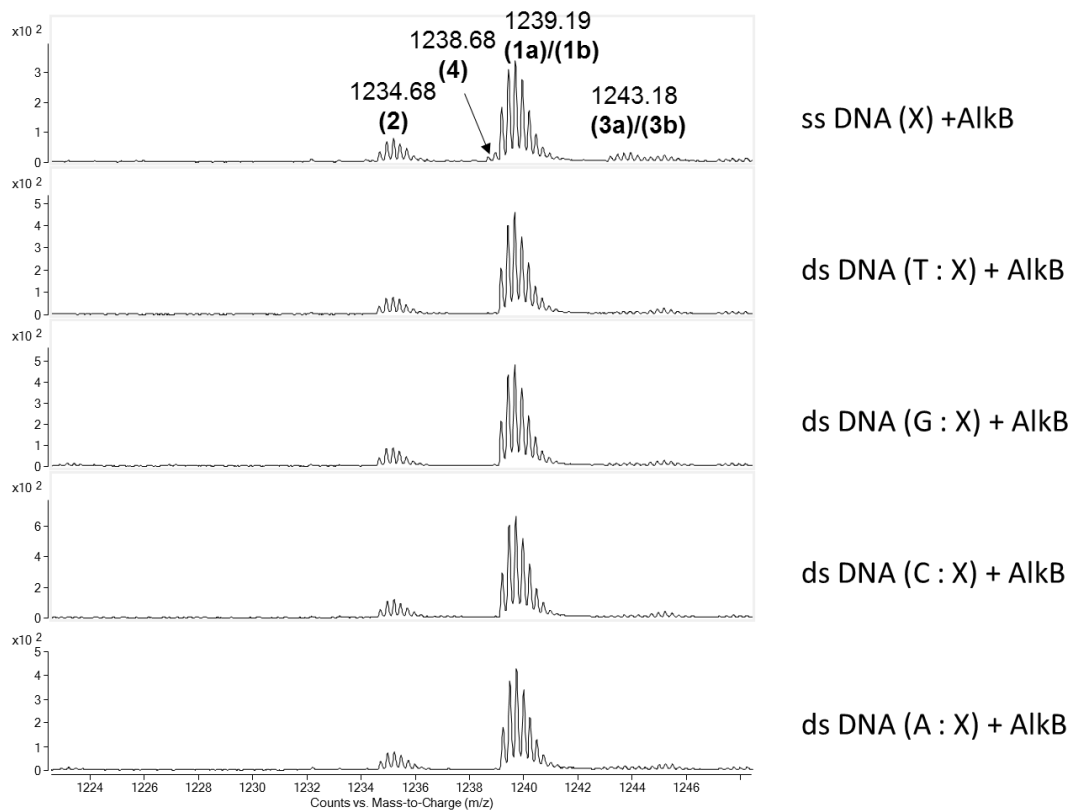

**Figure S3.** Repair of  $\alpha$ -OH-PdG (X) in single- and double-stranded DNA (ssDNA and dsDNA) by AlkB.

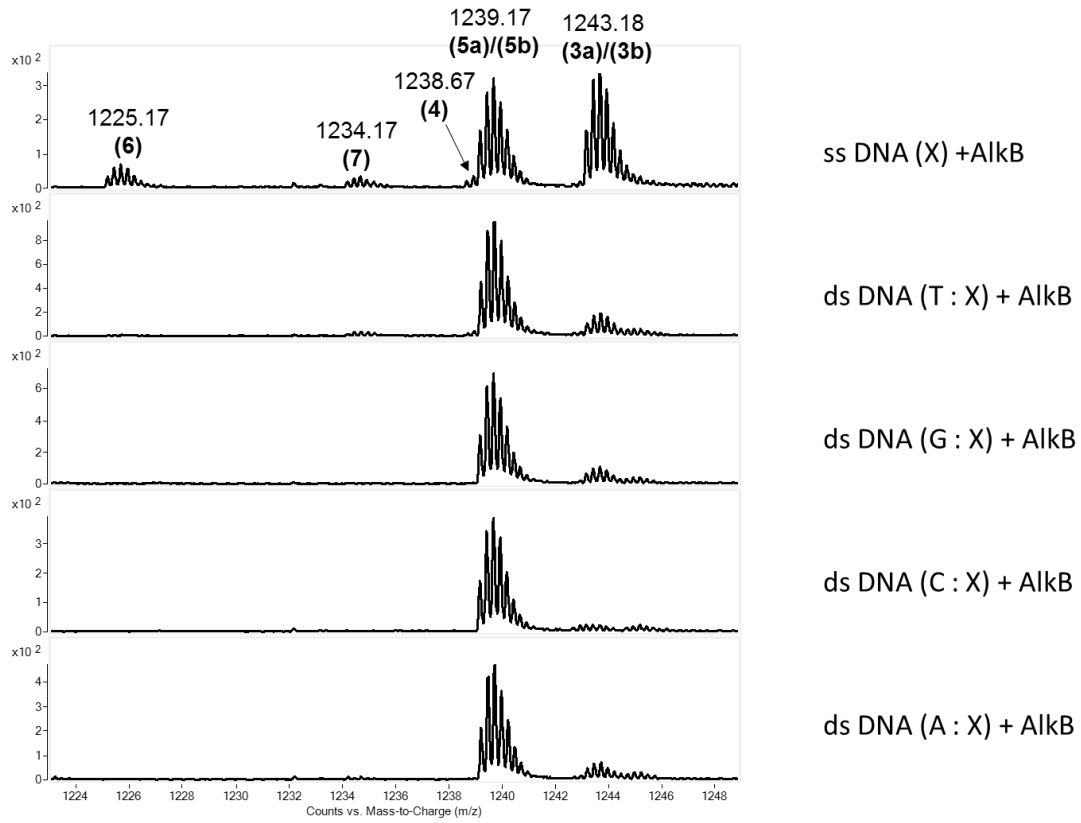

**Figure S4.** Repair of  $\gamma$ -OH-PdG (X) in single- and double-stranded DNA (ssDNA and dsDNA) by AlkB.

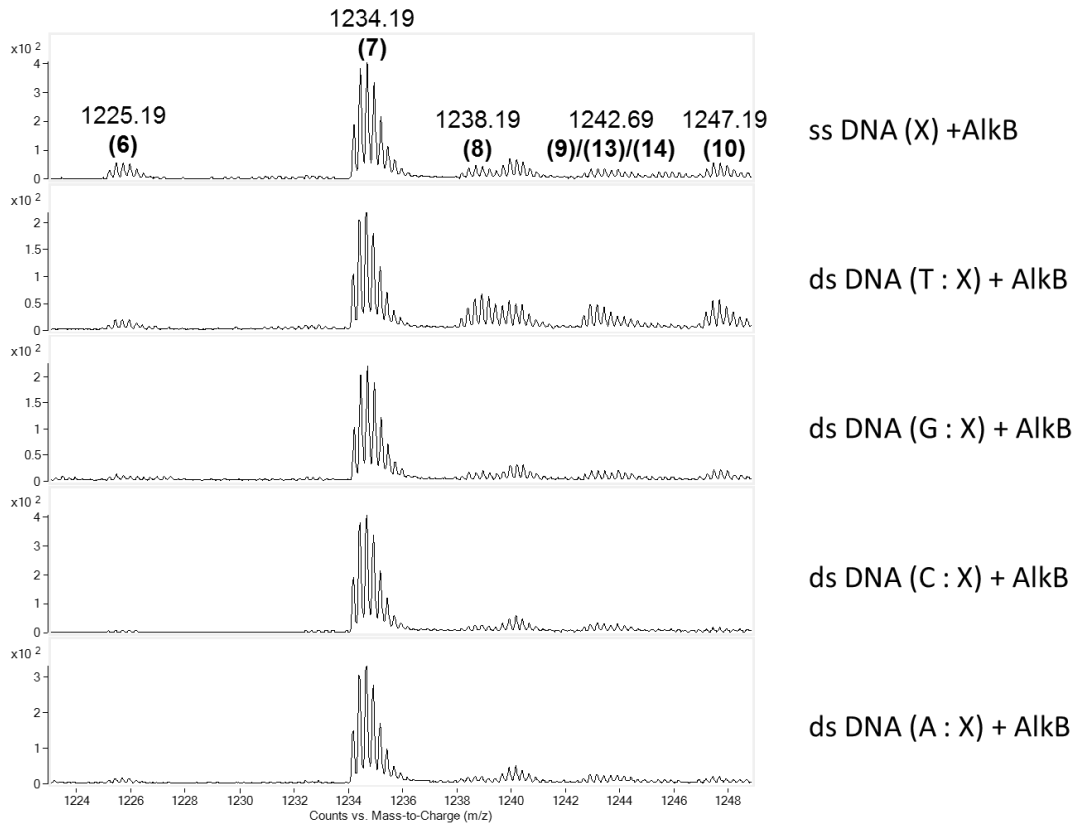

**Figure S5.** Repair of M<sub>1</sub>dG (X) in single- and double-stranded DNA (ssDNA and dsDNA) by AlkB.



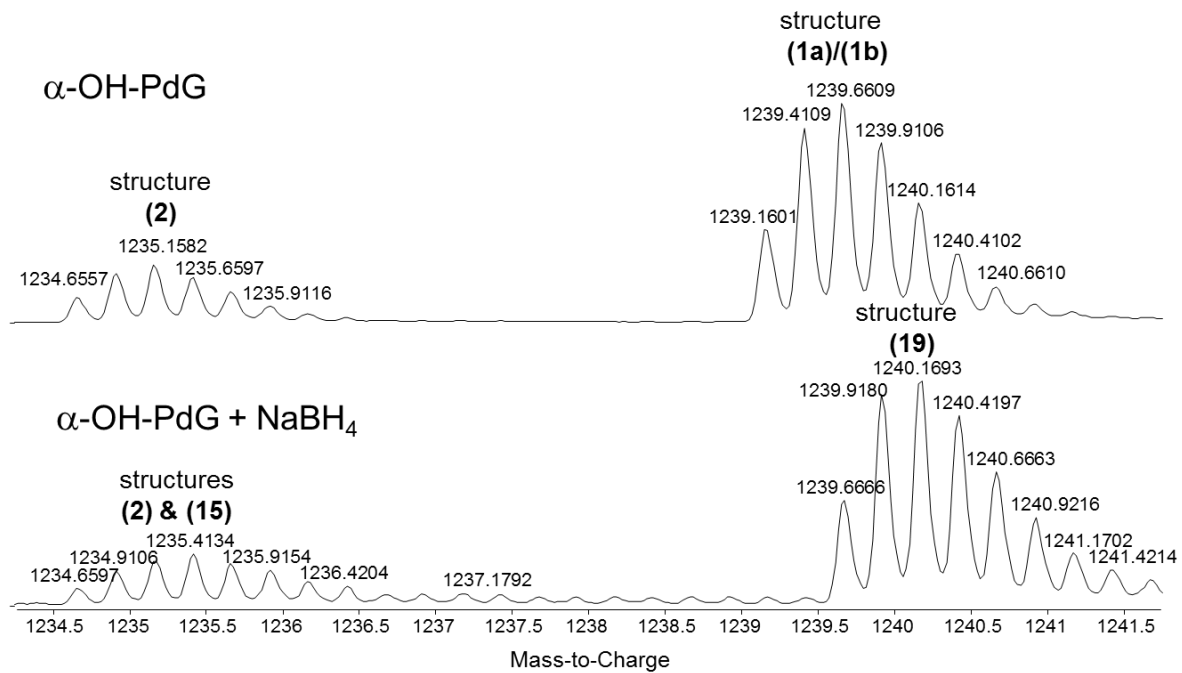

**Figure S6.** Reduction of  $\alpha$ -OH-PdG by NaBH<sub>4</sub>.

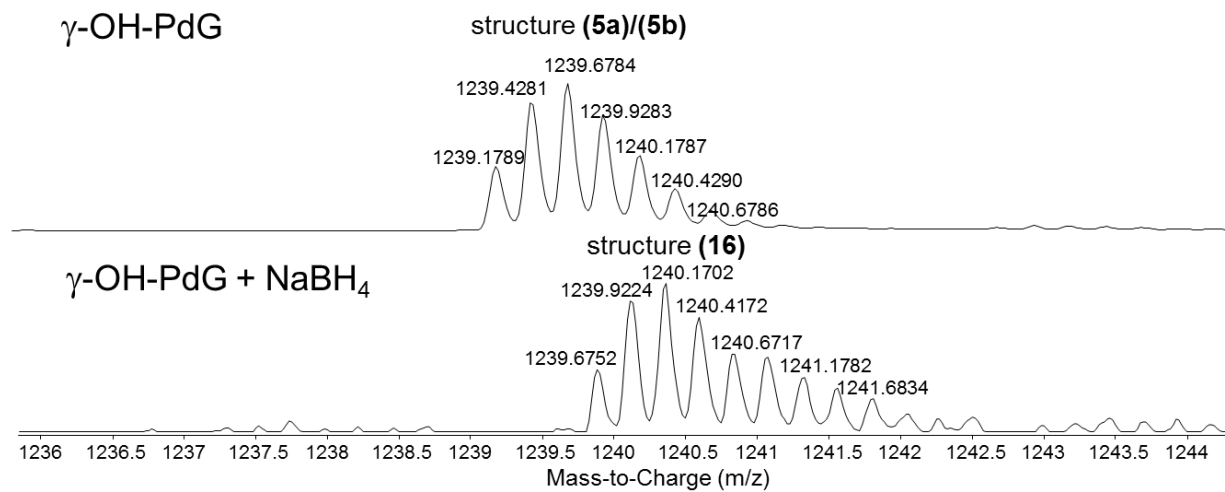

**Figure S7.** Reduction of  $\gamma$ -OH-PdG by NaBH<sub>4</sub>.

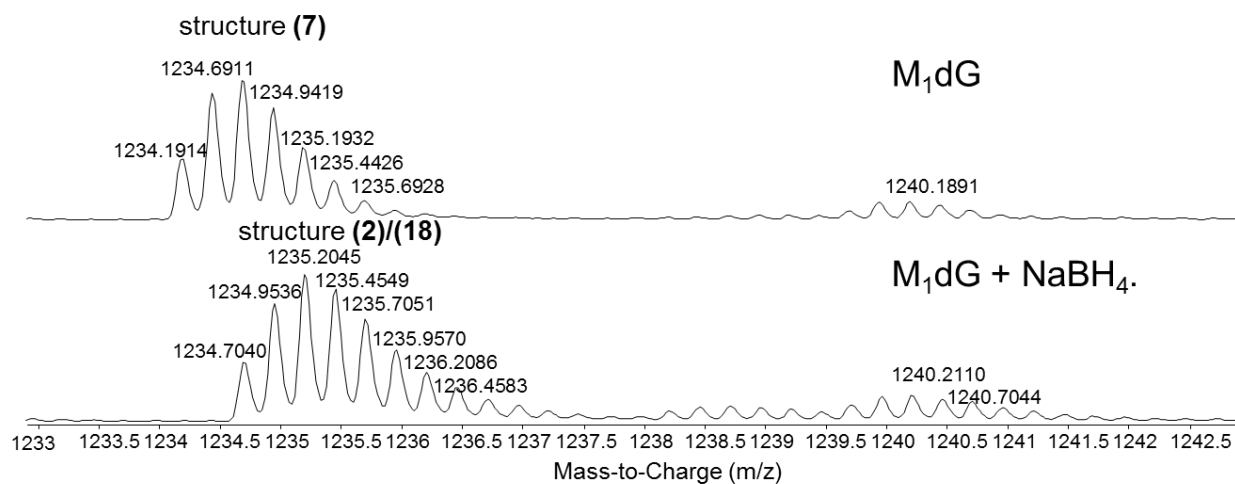

**Figure S8.** Reduction of M<sub>1</sub>dG by NaBH<sub>4</sub>.

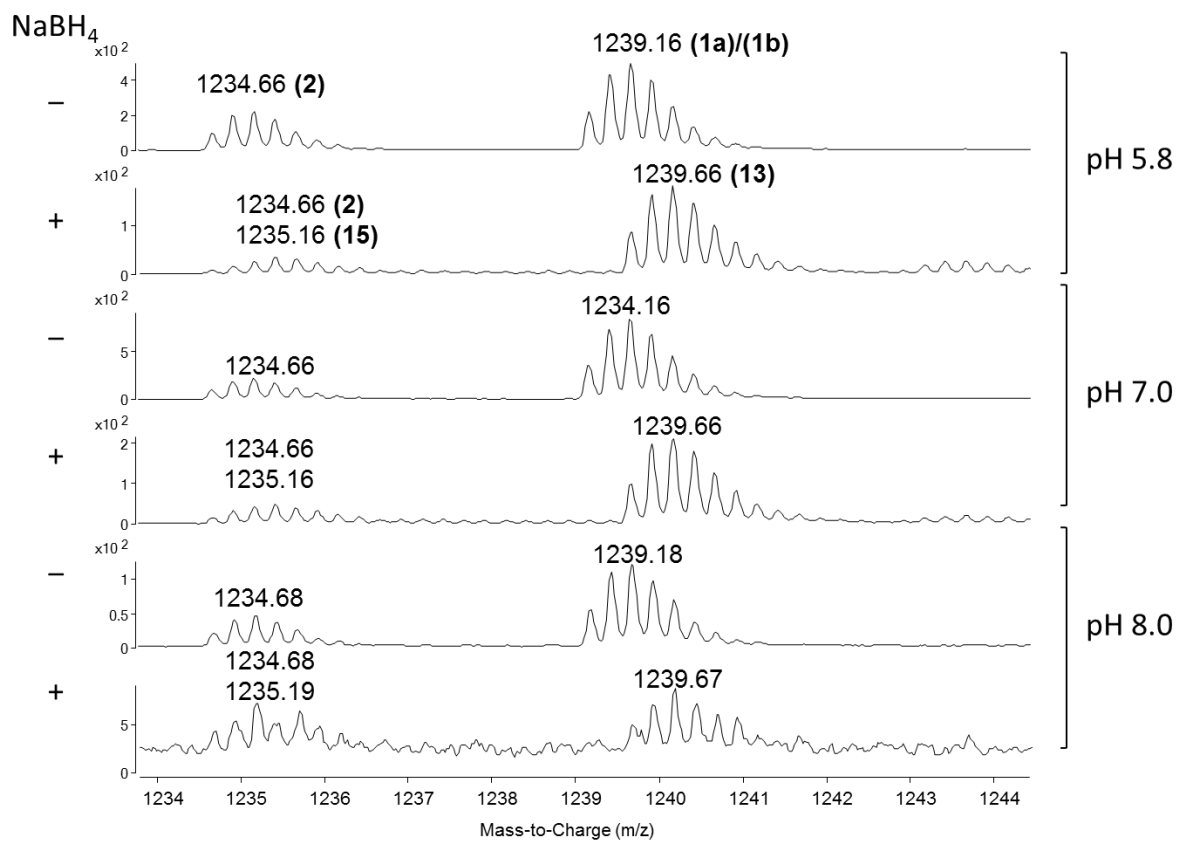

**Figure S9.** Effect of pH on reduction of  $\alpha$ -OH-PdG by NaBH<sub>4</sub>.

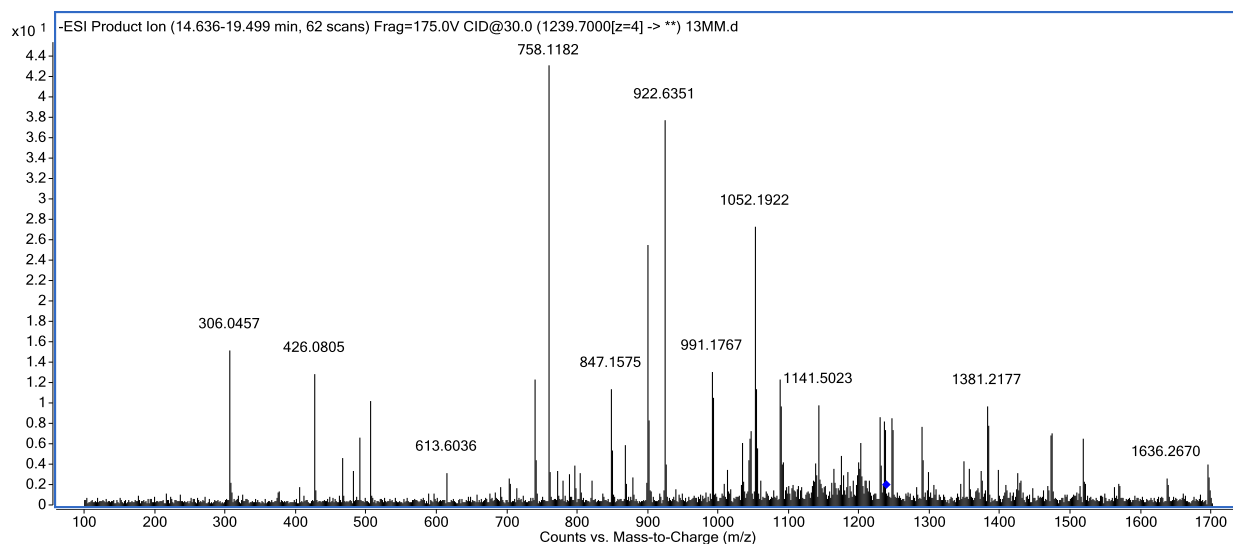

**Figure S10.** MS/MS fragmentation spectrum of 16mer containing  $\alpha$ -OH-PdG (structures **1a** & **1b**, unreacted starting material) in the incubation of  $\alpha$ -OH-PdG with AlkB. The blue diamond marks the parent ion.

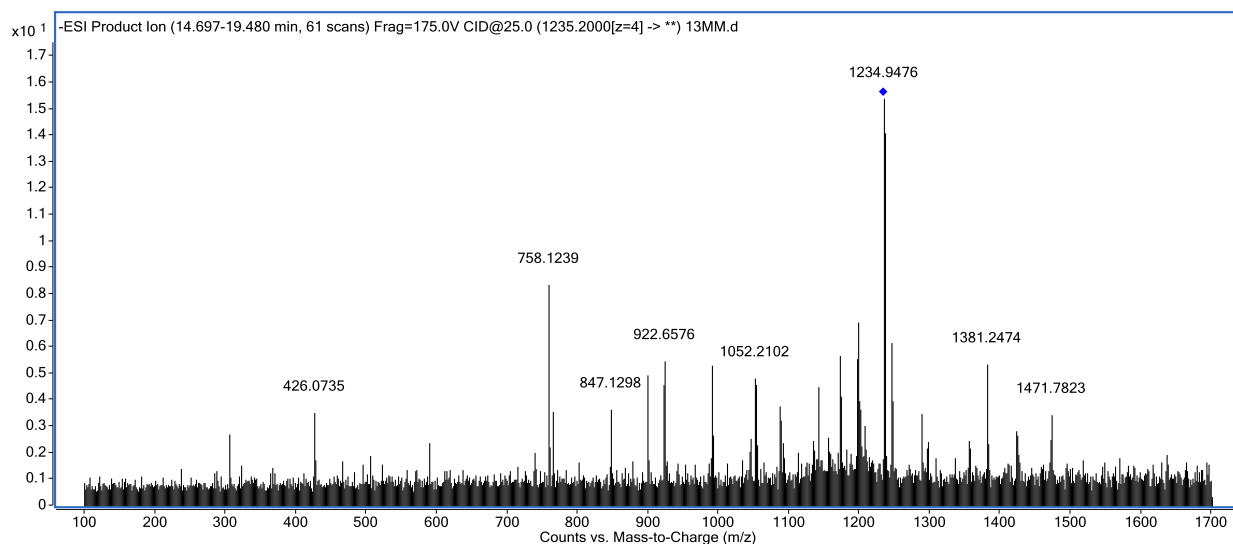

**Figure S11.** MS/MS fragmentation spectrum of 16mer containing dehydrated form of  $\alpha$ -OH-PdG (structure **2**) in the incubation of  $\alpha$ -OH-PdG with AlkB. The blue diamond marks the parent ion.

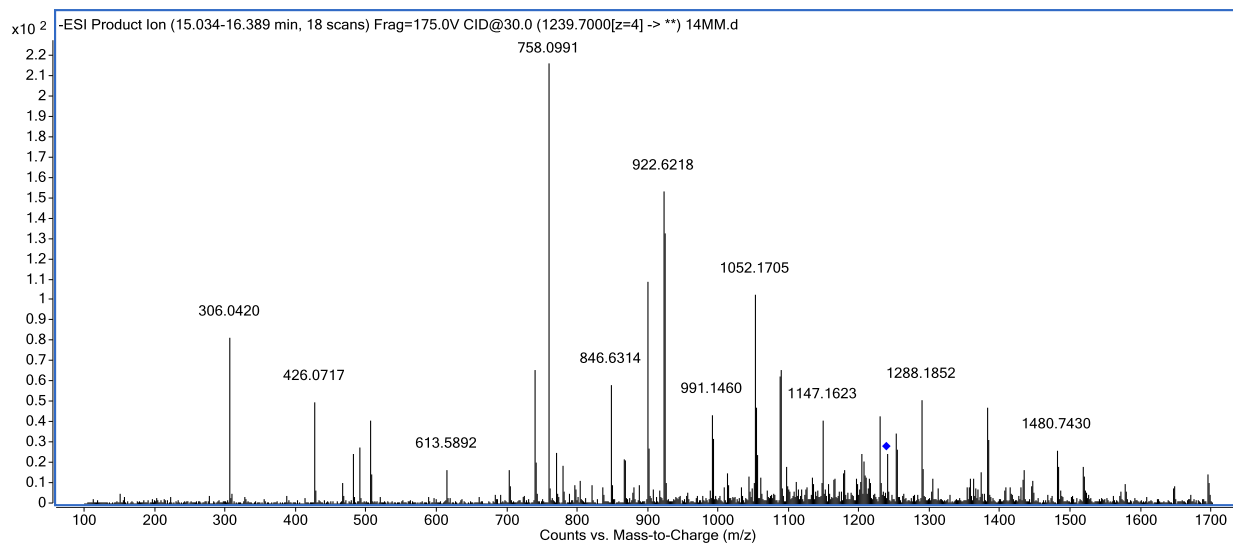

**Figure S12.** MS/MS fragmentation spectrum of 16mer containing  $\gamma$ -OH-PdG (structures **5a** & **5b**, unreacted starting material) in the reaction of  $\gamma$ -OH-PdG with AlkB. The blue diamond marks the parent ion.

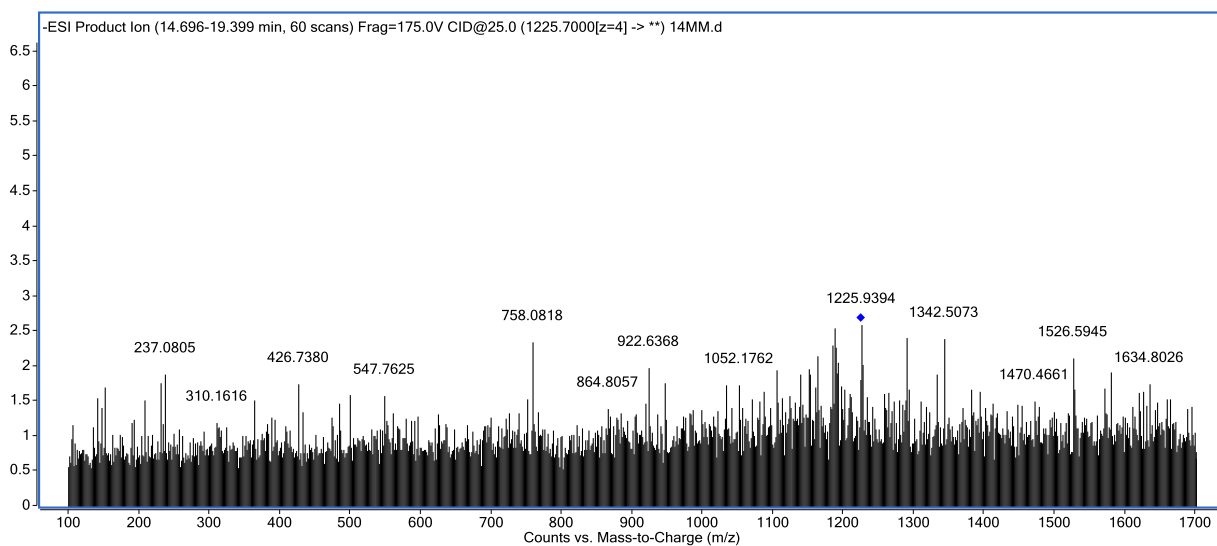

**Figure S13.** MS/MS fragmentation spectrum of 16mer containing G (structure **6**, repair product) in the incubation of  $\gamma$ -OH-PdG with AlkB. The blue diamond marks the parent ion.

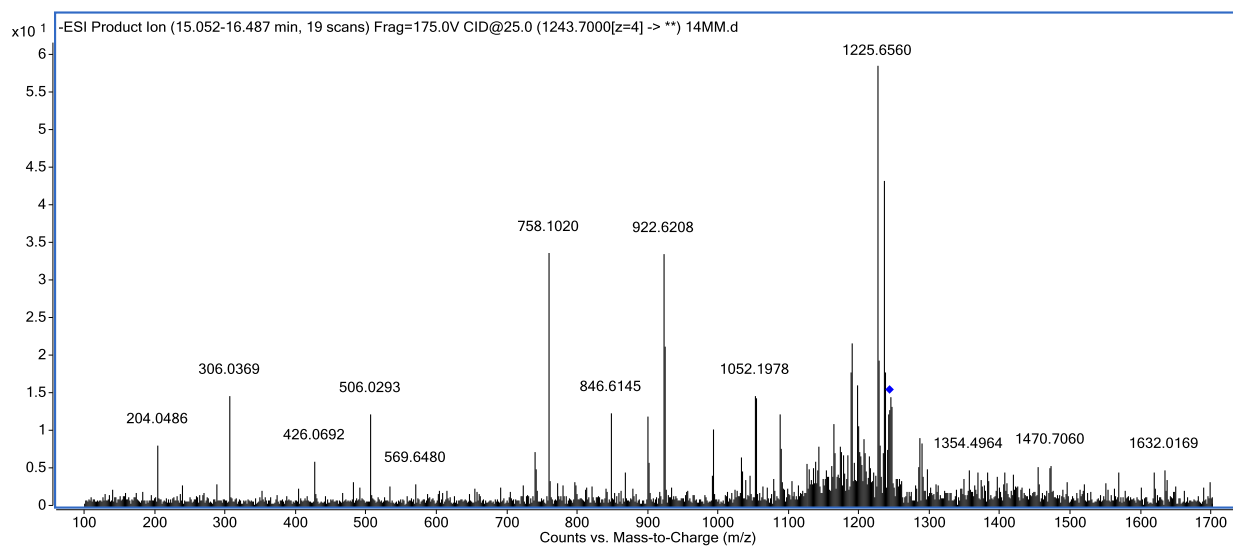

**Figure S14.** MS/MS fragmentation spectrum of 16mer containing oxidized  $\gamma$ -OH-PdG (structures **3a** & **3b**) in the incubation of  $\gamma$ -HOPG with AlkB. The blue diamond marks the parent ion.

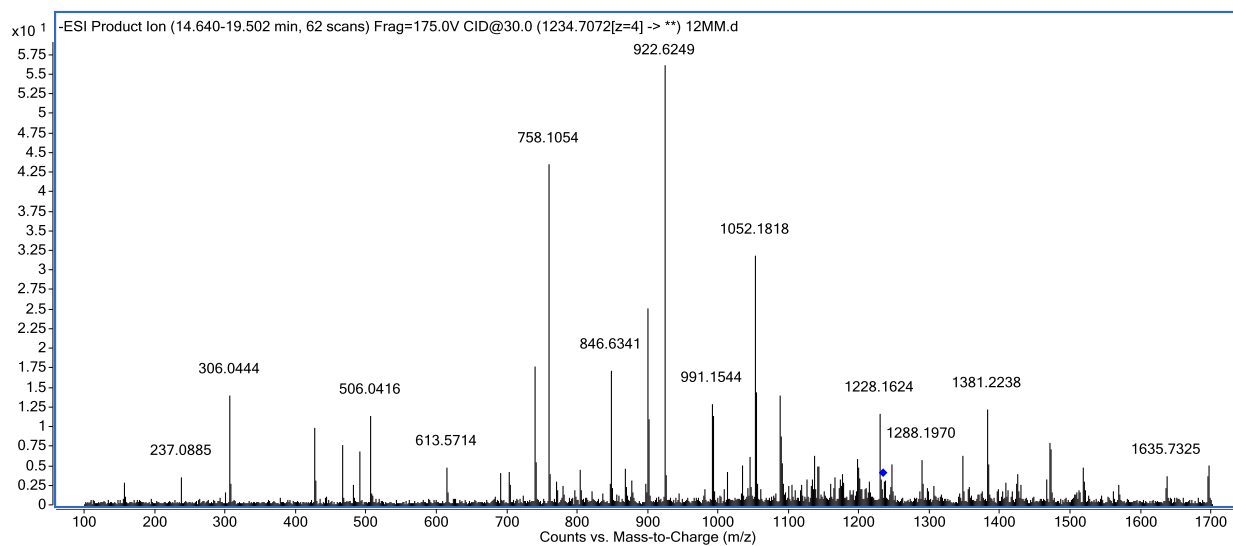

**Figure S15.** MS/MS fragmentation spectrum of 16mer containing  $M_1dG$  (structure **7**, unreacted starting material) in the incubation of  $M_1dG$  with AlkB. The blue diamond marks the parent ion.

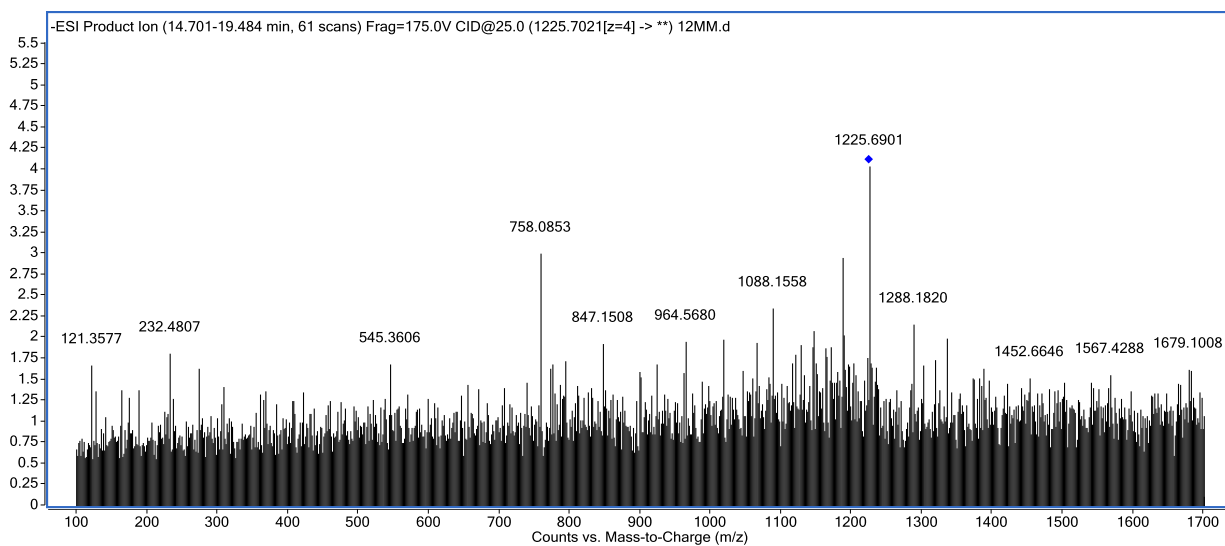

**Figure S16.** MS/MS fragmentation spectrum of 16mer containing G (structure 6) in the incubation of M<sub>1</sub>dG with AlkB. The blue diamond marks the parent ion.

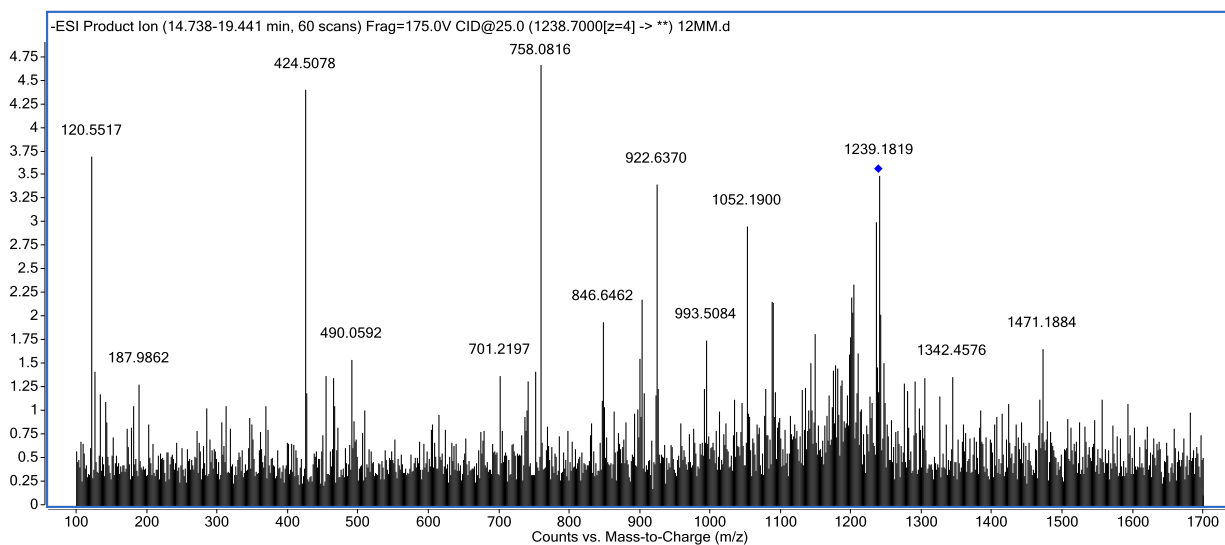

**Figure S17.** MS/MS fragmentation spectrum of 16mer containing oxidized M1G (structure 8, epoxide) in the incubation of M<sub>1</sub>dG with AlkB. The blue diamond marks the parent ion.



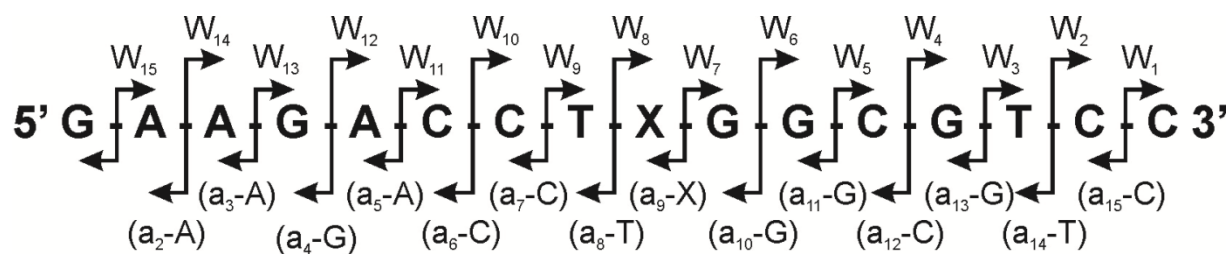

**Figure S18.** Predicted collision-induced dissociation (CID) fragmentation pattern of the 16mer oligonucleotide. X denotes the lesion or repair reaction intermediate or product. The  $m/z$  theoretical values of the CID fragments, calculated using Mongo Oligo Mass Calculator v2.06 (<http://library.med.utah.edu/masspec/mongo.htm>) are shown in Tables S2-S9.

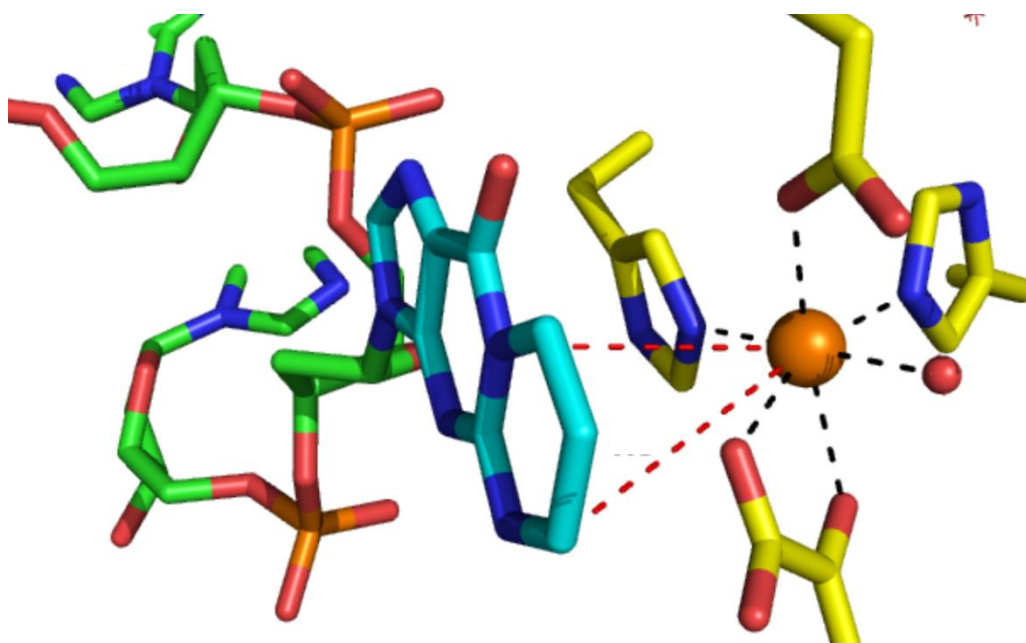

**Figure S19.** Showing distances between carbons (attached to N1- and  $N^2$ - positions) of  $M_1dG$  from the Fe in the active site of AlkB. The distances between the carbons attached to the N1 and the  $N^2$ - positions are approximately similar (shown in red). These distances are expected to be similar for other two exocyclic dG lesions ( $\alpha$ -OH-PdG and  $\gamma$ -OH-PdG), because similar to  $M_1dG$  both  $\alpha$ -OH-PdG and  $\gamma$ -OH-PdG are 3-carbon bridge exocyclic guanine adducts that are attached to the N1 and the  $N^2$ -positions of dG.

Table S1. Calculated and observed monoisotopic molecular weight of oligonucleotides containing lesions, intermediates, and their PFBHA derivatives. Structures are depicted in Figure 3 in the main text.

| Lesion, base or intermediate                     | MW (calculated) of neutral species | <i>m/z</i> (calculated) -4 charge monoisotopic peak | <i>m/z</i> (observed) -4 charge monoisotopic peak |
|--------------------------------------------------|------------------------------------|-----------------------------------------------------|---------------------------------------------------|
| $\alpha$ -OH-PdG ( <b>1b</b> )                   | 4960.88                            | 1239.21                                             | 1239.20/21                                        |
| $\alpha$ -OH-PdG – H <sub>2</sub> O ( <b>2</b> ) | 4942.87                            | 1234.71                                             | 1234.70/71                                        |
| <b>(1b)</b> + PFBHA                              | 5155.89                            | 1287.97                                             | 1287.98                                           |
| $\gamma$ -OH-PdG ( <b>5b</b> )                   | 4960.88                            | 1239.21                                             | 1239.21                                           |
| <b>(5b)</b> + PFBHA                              | 5155.89                            | 1287.97                                             | 1287.97                                           |
| M <sub>1</sub> dG ( <b>7</b> )                   | 4940.86                            | 1234.21                                             | 1234.20                                           |
| <b>(11b)</b> or <b>(12b)</b> + PFBHA             | 5153.88                            | 1287.46                                             | 1287.47                                           |

Table S2. Predicted and observed  $m/z$  for MS/MS fragmentation patterns displayed in Figure S10 of  $\alpha$ -OH-PdG (structures **1a** & **1b**) 16mer in the incubation of  $\alpha$ -OH-PdG with AlkB. Predicted CID fragments are shown in Figure S10.

| Fragment | Charge | Theoretical $m/z$ | Observed $m/z$ |
|----------|--------|-------------------|----------------|
| W1       | -1     | 306.048           | 306.047        |
| W2       | -1     | 595.094           | 595.106        |
| W3       | -1     | 899.139           | 899.139        |
| W4       | -2     | 613.592           | 613.595        |
| W5       | -2     | 758.115           | 758.115        |
| W6       | -2     | 922.641           | 922.634        |
| W7       | -2     | 1087.167          | 1087.147       |
| W8       | -2     | 1279.707          | 1279.670       |
| W9       | -2     | 1431.73           | 1431.704       |
| W10      | -3     | 1050.499          | 1050.263       |
| W11      | -3     | 1146.848          | 1146.898       |
| W13      | -4     | 1360.884          | 1360.536       |
| W14      | -4     | 1098.676          | 1098.487       |
| W15      | -4     | 1176.94           | 1176.951       |
| a2-A     | -1     | 426.080           | 426.077        |
| a3-A     | -1     | 739.137           | 739.132        |
| a4-G     | -1     | 1052.195          | 1052.193       |
| a5-A     | -1     | 1381.247          | 1381.216       |
| a6-C     | -2     | 846.648           | 846.648        |
| a7-C     | -2     | 991.171           | 991.173        |
| a8-T     | -2     | 1135.694          | 1135.431       |
| a9-X     | -2     | 1287.717          | 1287.701       |
| a10-G    | -3     | 986.502           | 986.030        |
| a11-G    | -3     | 1096.186          | 1096.191       |
| a12-C    | -3     | 1205.87           | 1205.566       |
| a13-G    | -3     | 1302.219          | 1302.522       |
| a14-T    | -3     | 1411.903          | 1411.834       |
| a15-C    | -3     | 1513.251          | 1513.163       |

Table S3. Predicted and observed  $m/z$  for MS/MS fragmentation patterns displayed in Figure S11 of dehydrated  $\alpha$ -OH-PdG (structure 2) 16mer in the incubation of  $\alpha$ -OH-PdG with AlkB. Predicted CID fragments are shown in Figure S11.

| Fragment | Charge | Theoretical $m/z$ | Observed $m/z$ |
|----------|--------|-------------------|----------------|
| W1       | -1     | 306.048           | 306.047        |
| W2       | -1     | 595.094           | 595.092        |
| W3       | -1     | 899.139           | 899.129        |
| W4       | -2     | 613.592           | 613.611        |
| W5       | -2     | 758.115           | 758.120        |
| W6       | -2     | 922.641           | 922.637        |
| W7       | -2     | 1087.167          | 1087.178       |
| W8       | -2     | 1270.702          | 1270.981       |
| W9       | -2     | 1422.725          | 1422.721       |
| W10      | -3     | 1044.496          | 1044.473       |
| W11      | -3     | 1140.845          | 1140.850       |
| W12      | -3     | 1245.197          | 1245.176       |
| W14      | -4     | 1094.173          | 1094.363       |
| W15      | -4     | 1172.437          | 1172.412       |
| a2-A     | -1     | 426.08            | 426.076        |
| a3-A     | -1     | 739.137           | 739.147        |
| a4-G     | -1     | 1052.195          | 1052.195       |
| a5-A     | -1     | 1381.247          | 1381.275       |
| a6-C     | -2     | 846.648           | 846.627        |
| a7-C     | -2     | 991.171           | 991.177        |
| a8-T     | -2     | 1135.694          | 1135.891       |
| a9-X     | -2     | 1287.717          | 1287.710       |
| a10-G    | -2     | 1471.252          | 1471.261       |
| a11-G    | -3     | 1090.183          | 1090.215       |
| a12-C    | -3     | 1199.867          | 1199.763       |
| a13-G    | -3     | 1296.215          | 1296.242       |
| a14-T    | -3     | 1405.899          | 1405.831       |
| a15-C    | -3     | 1507.248          | 1507.261       |

Table S4. Predicted and observed  $m/z$  for MS/MS fragmentation patterns displayed in Figure S12 of  $\gamma$ -OH-PdG (structures **5a** & **5b**) 16mer in the incubation of  $\gamma$ -OH-PdG with AlkB. Predicted CID fragments are shown in Figure S12.

| Fragment | Charge | Theoretical $m/z$ | Observed $m/z$ |
|----------|--------|-------------------|----------------|
| W1       | -1     | 306.048           | 306.042        |
| W2       | -1     | 595.094           | 595.088        |
| W3       | -1     | 899.139           | 899.117        |
| W4       | -2     | 613.592           | 613.582        |
| W5       | -2     | 758.115           | 758.099        |
| W6       | -2     | 922.641           | 922.621        |
| W7       | -2     | 1087.167          | 1087.134       |
| W9       | -2     | 1431.73           | 1431.690       |
| W10      | -3     | 1050.499          | 1050.477       |
| W11      | -3     | 1146.848          | 1146.832       |
| W12      | -3     | 1251.2            | 1251.181       |
| W15      | -4     | 1176.94           | 1176.893       |
| a2-A     | -1     | 426.080           | 426.071        |
| a3-A     | -1     | 739.137           | 739.123        |
| a4-G     | -1     | 1052.195          | 1052.171       |
| a5-A     | -1     | 1381.247          | 1381.217       |
| a6-C     | -2     | 846.648           | 846.630        |
| a7-C     | -2     | 991.171           | 991.147        |
| a9-X     | -2     | 1287.717          | 1287.704       |
| a10-G    | -2     | 1480.257          | 1480.234       |
| a11-G    | -3     | 1096.186          | 1096.153       |
| a12-C    | -3     | 1205.87           | 1205.862       |
| a13-G    | -3     | 1302.219          | 1302.188       |

Table S5. Predicted and observed  $m/z$  for MS/MS fragmentation patterns displayed in Figure S13 of G (structure **6**) 16mer in the incubation of  $\gamma$ -OH-PdG with AlkB. Predicted CID fragments are shown in Figure S13.

| <b>Fragment</b> | <b>Charge</b> | <b>Theoretical <math>m/z</math></b> | <b>Observed <math>m/z</math></b> |
|-----------------|---------------|-------------------------------------|----------------------------------|
| W1              | -1            | 306.048                             | 306.056                          |
| W2              | -1            | 595.094                             | 595.007                          |
| W4              | -2            | 613.592                             | 613.558                          |
| W5              | -2            | 758.115                             | 758.084                          |
| W6              | -2            | 922.641                             | 922.602                          |
| W7              | -2            | 1087.167                            | 1087.135                         |
| W11             | -3            | 1128.172                            | 1128.089                         |
| W12             | -3            | 1232.524                            | 1232.209                         |
| W13             | -4            | 1006.404                            | 1006.368                         |
| W15             | -4            | 1162.933                            | 1162.921                         |
| a2-A            | -1            | 426.080                             | 426.060                          |
| a3-A            | -1            | 739.137                             | 739.098                          |
| a5-A            | -1            | 1381.247                            | 1381.172                         |
| a6-C            | -2            | 846.648                             | 846.636                          |
| a7-C            | -2            | 991.171                             | 991.671                          |
| a8-T            | -2            | 1135.694                            | 1135.704                         |
| a9-X            | -2            | 1287.717                            | 1287.684                         |
| a10-G           | -2            | 1452.243                            | 1452.697                         |
| a11-G           | -3            | 1077.510                            | 1077.833                         |
| a12-C           | -3            | 1187.194                            | 1187.097                         |
| a13-G           | -3            | 1283.543                            | 1283.550                         |

Table S6. Predicted and observed  $m/z$  for MS/MS fragmentation patterns displayed in Figure S14 of oxidized  $\gamma$ -OH-PdG (structures **3a** & **3b**) 16mer in the incubation of  $\gamma$ -OH-PdG with AlkB. Predicted CID fragments are shown in Figure S14.

| Fragment | Charge | Theoretical $m/z$ | Observed $m/z$ |
|----------|--------|-------------------|----------------|
| W1       | -1     | 306.048           | 306.040        |
| W2       | -1     | 595.094           | 595.083        |
| W3       | -1     | 899.139           | 899.112        |
| W4       | -2     | 613.592           | 613.593        |
| W5       | -2     | 758.115           | 758.101        |
| W6       | -2     | 922.641           | 922.622        |
| W7       | -2     | 1087.167          | 1087.153       |
| W8       | -2     | 1289.702          | 1289.790       |
| W9       | -2     | 1439.725          | 1439.617       |
| W10      | -3     | 1055.829          | 1055.870       |
| W11      | -3     | 1152.178          | 1152.146       |
| W12      | -3     | 1256.53           | 1256.588       |
| W13      | -4     | 1024.409          | 1024.226       |
| W14      | -4     | 1102.673          | 1102.490       |
| W15      | -4     | 1180.937          | 1180.950       |
| a2-A     | -1     | 426.080           | 426.077        |
| a3-A     | -1     | 739.137           | 739.181        |
| a4-G     | -1     | 1052.195          | 1052.192       |
| a5-A     | -1     | 1381.247          | 1381.252       |
| a6-C     | -2     | 846.648           | 846.617        |
| a7-C     | -2     | 991.171           | 991.132        |
| a8-T     | -2     | 1135.694          | 1135.700       |
| a9-X     | -2     | 1287.717          | 1287.715       |
| a10-G    | -2     | 1488.252          | 1488.257       |
| a11-G    | -3     | 1101.516          | 1101.496       |
| a12-C    | -3     | 1211.2            | 1211.445       |
| a13-G    | -3     | 1307.549          | 1307.455       |
| a14-T    | -3     | 1417.233          | 1417.220       |



Table S7. Predicted and observed  $m/z$  for MS/MS fragmentation patterns displayed in Figure S15 of M<sub>1</sub>dG (structure 7) 16mer in the incubation of M<sub>1</sub>dG with AlkB. Predicted CID fragments are shown in Figure S15.

| Fragment | Charge | Theoretical $m/z$ | Observed $m/z$ |
|----------|--------|-------------------|----------------|
| W1       | -1     | 306.048           | 306.045        |
| W2       | -1     | 595.094           | 595.130        |
| W3       | -1     | 899.139           | 899.125        |
| W4       | -2     | 613.592           | 613.590        |
| W5       | -2     | 758.115           | 758.107        |
| W6       | -2     | 922.641           | 922.628        |
| W7       | -2     | 1087.167          | 1087.152       |
| W8       | -2     | 1269.692          | 1269.553       |
| W9       | -2     | 1421.715          | 1421.684       |
| W10      | -3     | 1043.823          | 1043.799       |
| W11      | -3     | 1140.171          | 1140.154       |
| W12      | -3     | 1244.524          | 1244.506       |
| W13      | -3     | 1354.208          | 1354.141       |
| W14      | -3     | 1458.56           | 1458.789       |
| W15      | -4     | 1171.932          | 1171.910       |
| a2-A     | -1     | 426.08            | 426.077        |
| a3-A     | -1     | 739.137           | 739.127        |
| a4-G     | -1     | 1052.195          | 1052.184       |
| a5-A     | -1     | 1381.247          | 1381.218       |
| a6-C     | -2     | 846.648           | 846.636        |
| a7-C     | -2     | 991.171           | 991.152        |
| a8-T     | -2     | 1135.694          | 1135.562       |
| a9-X     | -2     | 1287.717          | 1287.688       |
| a10-G    | -2     | 1470.242          | 1470.205       |
| a11-G    | -3     | 1089.509          | 1089.461       |
| a12-C    | -3     | 1199.193          | 1199.149       |
| a13-G    | -3     | 1295.542          | 1295.531       |
| a15-C    | -4     | 1129.679          | 1129.769       |

Table S8. Predicted and observed  $m/z$  for MS/MS fragmentation patterns displayed in Figure S16 of G (structure **6**) 16mer in the incubation of M<sub>1</sub>dG with AlkB. Predicted CID fragments are shown in Figure S16.

| Fragment | Charge | Theoretical $m/z$ | Observed $m/z$ |
|----------|--------|-------------------|----------------|
| W1       | -1     | 306.048           | 306.052        |
| W3       | -1     | 899.139           | 899.107        |
| W4       | -2     | 613.592           | 613.586        |
| W5       | -2     | 758.115           | 758.085        |
| W6       | -2     | 922.641           | 922.647        |
| W7       | -2     | 1087.167          | 1087.219       |
| W9       | -2     | 1403.716          | 1403.733       |
| W10      | -3     | 1031.823          | 1031.741       |
| W11      | -3     | 1128.172          | 1128.129       |
| W12      | -4     | 924.141           | 924.117        |
| W13      | -4     | 1006.404          | 1006.532       |
| W14      | -3     | 1446.561          | 1446.764       |
| W15      | -4     | 1162.933          | 1162.796       |
| a2-A     | -1     | 426.080           | 426.057        |
| a3-A     | -1     | 739.137           | 739.097        |
| a4-G     | -1     | 1052.195          | 1052.178       |
| a5-A     | -1     | 1381.247          | 1381.248       |
| a6-C     | -2     | 846.648           | 846.663        |
| a7-C     | -2     | 991.171           | 991.137        |
| a8-T     | -2     | 1135.694          | 1135.773       |
| a9-X     | -3     | 858.142           | 858.111        |
| a10-G    | -3     | 967.826           | 967.566        |
| a11-G    | -3     | 1077.510          | 1077.827       |
| a12-C    | -3     | 1187.194          | 1187.206       |
| a13-G    | -3     | 1283.543          | 1283.516       |
| a14-T    | -3     | 1393.227          | 1393.575       |
| a15-C    | -4     | 1120.679          | 1120.636       |

Table S9. Predicted and observed  $m/z$  for MS/MS fragmentation patterns displayed in Figure S17 of M<sub>1</sub>dG (structure **8**) 16mer in the incubation of M<sub>1</sub>dG with AlkB. Predicted CID fragments are shown in Figure S17.

| Fragment | Charge | Theoretical $m/z$ | Observed $m/z$ |
|----------|--------|-------------------|----------------|
| W1       | -1     | 306.048           | 306.053        |
| W2       | -1     | 595.094           | 595.006        |
| W3       | -1     | 899.139           | 899.135        |
| W4       | -2     | 613.592           | 613.172        |
| W5       | -2     | 758.115           | 758.086        |
| W6       | -2     | 922.641           | 922.628        |
| W7       | -2     | 1087.167          | 1087.108       |
| W8       | -2     | 1278.255          | 1278.267       |
| W9       | -2     | 1430.353          | 1430.448       |
| W10      | -3     | 1049.628          | 1049.908       |
| W11      | -3     | 1146.023          | 1146.176       |
| W12      | -3     | 1250.426          | 1250.271       |
| W14      | -3     | 1464.566          | 1464.267       |
| W15      | -4     | 1176.475          | 1176.429       |
| a2-A     | -1     | 426.08            | 426.073        |
| a3-A     | -1     | 739.137           | 739.177        |
| a4-G     | -1     | 1052.195          | 1052.189       |
| a5-A     | -1     | 1381.247          | 1381.229       |
| a6-C     | -2     | 846.648           | 846.647        |
| a7-C     | -2     | 991.171           | 991.188        |
| a8-T     | -2     | 1135.694          | 1135.623       |
| a9-X     | -2     | 1288.353          | 1288.219       |
| a10-G    | -2     | 1478.917          | 1478.893       |
| a11-G    | -3     | 1095.345          | 1095.316       |
| a12-C    | -3     | 1205.082          | 1205.045       |
| a13-G    | -3     | 1301.477          | 1301.447       |
| a14-T    | -3     | 1411.214          | 1411.226       |
| a15-C    | -4     | 1134.207          | 1134.162       |
